1     **The hydroalcoholic extract of *Uncaria tomentosa* (Cat's claw) inhibits the replication of**  
2                                     **novel coronavirus (SARS-CoV-2) *in vitro***

3     Andres F. Yepes-Perez <sup>a</sup>, Oscar Herrera-Calderón <sup>b</sup>, Lizdany Flórez-Álvarez <sup>c</sup>, María I. Zapata-  
4             Cardona <sup>c</sup>, Lina Yepes <sup>c</sup>, Wbeimar Aguilar <sup>c</sup>, María T. Rugeles <sup>c</sup>, Wildeman Zapata <sup>c,d</sup>

5

6             a. Chemistry of Colombian Plants, Institute of Chemistry, Faculty of Exact and Natural  
7             Sciences, University of Antioquia-UdeA, Calle 70 No. 52-21, A.A 1226, Medellin,  
8             Colombia

9             b. Academic Department of Pharmacology, Bromatology and Toxicology, Faculty of  
10            Pharmacy and Biochemistry, Universidad Nacional Mayor de San Marcos, Jr Puno  
11            1002, Lima 15001, Peru.

12            c. Grupo Inmunovirología, Facultad de Medicina, Universidad de Antioquia UdeA,  
13            Medellín, Colombia.

14            d. Grupo Infettare, Facultad de Medicina, Universidad Cooperativa de Colombia,  
15            Medellín, Colombia.

16

17

18     **Corresponding author.** Jr. Puno 1002, Faculty of Pharmacy and Biochemistry, Universidad  
19     Nacional Mayor de San Marcos, Lima 15001, Peru. Tel.: + 51 9 56 550 510. E-mail:  
20     oherreraca@unmsm.edu.pe .

21

22

23

24

25

26

27

28

29

30

31

32

33

34

35

36

37 **Abstract**

38 The coronavirus disease 2019 (COVID-19) has become a serious problem for public health  
39 since it was identified in the province of Wuhan (China) and spread around the world producing  
40 high mortality rates and economic losses. Nowadays, WHO recognizes traditional,  
41 complementary, and alternative medicine for treating COVID-19 symptoms. Therefore, we  
42 investigated the antiviral potential of the hydroalcoholic extract of *Uncaria tomentosa* stem  
43 bark from Peru against SARS-CoV-2 *in vitro*. The antiviral activity of *U. tomentosa* against  
44 SARS-CoV-2 *in vitro* was assessed in Vero E6 cells using cytopathic effect (CPE) and plaque  
45 reduction assay. After 48h of treatment, *U. tomentosa* showed an inhibition of 92.7 % of SARS-  
46 CoV-2 at 25.0 µg/mL (p<0.0001) by plaque reduction assay on Vero E6 cells. In addition, *U.*  
47 *tomentosa*, induced a reduction of 98.6 % (p=0.02) and 92.7 % (p=0.03) in the CPE caused by  
48 SARS-CoV-2 on Vero E6 cells at 25 µg/mL and 12.5 µg/mL, respectively. The EC<sub>50</sub> calculated  
49 for *U. tomentosa* extract by plaque reduction assay was 6.6 µg/mL (4.89 – 8.85 µg/mL) for a  
50 selectivity index of 4.1. The EC<sub>50</sub> calculated for *U. tomentosa* extract by TCID<sub>50</sub> assay was 2.57  
51 µg/mL (1.05 – 3.75 µg/mL) for a selectivity index of 10.54. These results showed that *U.*  
52 *tomentosa* known as Cat's claw has antiviral effect against SARS-CoV-2 observed as a  
53 reduction in the viral titer and CPE after 48h of treatment on Vero E6 cells. Therefore, we  
54 hypothesized that *U. tomentosa* stem bark, could be promissory to the development of new  
55 therapeutic strategies against SARS-CoV-2.

56 **Keywords:** *Uncaria tomentosa*, Cat's claw; Antivirals; Coronavirus; SARS-CoV-2; COVID-  
57 19.

58

59

60

61

62

63

64

65

## 66 **1. Introduction**

67 The severe acute respiratory syndrome coronavirus 2 (SARS-CoV-2) has caused serious public  
68 health problems since it was identified in Wuhan (China) in late 2019 [1]. The World Health  
69 Organization (WHO) declared Coronavirus disease 2019 (COVID-19) a pandemic on March  
70 11, 2020 [2]. According to the latest report of the WHO, over 40,2 million cases and 1,100,000  
71 deaths by COVID-19 were confirmed to October 20, 2020 [3]. When, the novel coronavirus  
72 (SARS-CoV-2) arrived to Latin-America, Brazil was the first South American country to  
73 declare a patient with COVID-19 whereas Venezuela and Uruguay were the ultimate nations to  
74 confirm their patient zero considering the pandemic epicenter after Europe [4]. Although some  
75 vaccines phase 3 medical trials are being tested in different countries sponsored by the  
76 pharmaceutical industry, currently, there is no vaccines, preventive treatment or antiviral drug  
77 available against SARS-CoV-2 [5].

78 Nowadays, the World Health Organization (WHO) recognizes that traditional, complementary,  
79 and alternative medicine has many benefits [6]. Several candidates with possible antiviral  
80 effects have been explored from medicinal plants in the preclinical phase. *Uncaria tomentosa*  
81 (Willd) DC., (*U. tomentosa*) belongs to Rubiaceae family, which is also known as Cat's claw, it  
82 contains more than 50 phytochemicals [7]. Oxindole alkaloids (pentacyclic oxindole alkaloids  
83 (POA) and tetracyclic oxindole alkaloids (TOA)) have been recognized as fingerprint of this  
84 species in some pharmacopeias and several pharmacological activities are linked to this kind of  
85 alkaloids [8,9]. It has been demonstrated that *Uncaria tomentosa* (*U. tomentosa*) exerts an  
86 antiviral effect on human monocytes infected with dengue virus 2 (DENV-2) [10] and herpes  
87 simplex virus type 1 (HSV-1) [11]. In our previous studies *in silico*, *U. tomentosa*'s components  
88 inhibited the SARS-CoV-2 enzyme 3CL<sup>pro</sup> and disrupted the interface of the receptor-binding  
89 domain of angiotensin-converting enzyme 2 (RBD-ACE-2) as well as the SARS-CoV-2 spike  
90 glycoprotein [12,13]. Additionally, bio-activities as anti-inflammatory [14], antiplatelet [15] and  
91 immunomodulatory [16] were demonstrated. Furthermore, other components isolated from the  
92 stem bark such as quinovic acids, polyphenols (flavonoids, proanthocyanidins, and tannins),  
93 triterpenes, glycosides and saponins were identified by instrumental methods [9,17–20].

94 The evaluation of natural compounds to inhibit SARS-CoV-2 in preclinical studies might lead  
95 to discover new antiviral drugs and for a better understanding of the viral life cycle. Several cell  
96 lines such as Human airway epithelial cells, Vero E6 cells, Caco-2 cells, Calu-3 cells,

97 HEK293T cells, and Huh7 cells are considered the best models *in vitro* to determine the  
98 antiviral activity against SARS-CoV-2 [21]. Hence, the investigations of medicinal plants using  
99 specially Vero E6 cell to replicate SARS-CoV-2 and given that is highly expressed the ACE -2  
100 receptor, in kidney tissue, some mechanism could be evaluated due to the characteristics of this  
101 culture medium.

102 Although the pathophysiology of COVID-19 is not completely understood, a severe  
103 inflammatory process has been associated with the severity and progression of the disease [22].  
104 Therefore, the immune activation so far described during the course of the infection as well as  
105 the pulmonary injury could be ameliorated by *U. tomentosa* due to its traditional use as anti-  
106 inflammatory [23], in the folk medicine from South America during years.

107 Based on its antiviral activity on other ARN virus and our *in-silico* findings against SARS-  
108 CoV-2, we assayed the hydroalcoholic extract of *U. tomentosa* stem bark from Peru as potential  
109 antiviral agent *in vitro* against this novel coronavirus.

110

## 111 **2. Material and method**

### 112 **2.1. Plant material**

113 The *U. tomentosa* (Cat's claw) used in this investigation is dispensed to patients of the  
114 Complementary Medicine Service of EsSalud (Social Health Insurance) in Peru for  
115 inflammatory disorders. The raw material (stem bark) of *U. tomentosa* was sourced from the  
116 Pharmacy Office of EsSalud in Ica, Peru. Next, the stem bark of *U. tomentosa* was transported  
117 to the Faculty of Medicine, of the Universidad Nacional Mayor de San Marcos (UNMSM,  
118 Lima, Peru) in order to obtain the hydroalcoholic extract.

### 119 **2.2. Obtaining extract from plant material**

120 One hundred grams of the raw plant material (stem bark) of *U. tomentosa* was powdered and  
121 extracted with 700 ml of 70% ethanol at room temperature for 7 days. Then, the extract was  
122 evaporated by using rotary evaporation to obtain a desiccated extract, which was stored at 4 °C  
123 until further use.

### 124 **2.3. Preparation of stock solution of *U. tomentosa* extract**

125 One mg of *U. tomentosa* hydroalcoholic extract was suspended in 1mL of DMSO. The solution  
126 was maintained at room temperature, protected from light until use. To prepare a working  
127 solution, the stock was diluted to 50mg/mL in DMEM supplemented with 2% Fetal Bovine  
128 Serum (FBS) (Final concentration DMSO 5%).

129

#### 130 **2.4. Cell lines and virus**

131 Vero E6 epithelial cell line from *Cercopithecus aethiops* kidney was donated by Instituto  
132 Nacional de Salud (INS) (Bogotá, Colombia). Cells were maintained in Dulbecco's modified  
133 Eagle medium (DMEM) supplemented with 2% FBS and 1% Penicillin-Streptomycin. Cultures  
134 were maintained at 37°C, with 5% CO<sub>2</sub>. Infections were done with a viral stock produced from a  
135 Colombian isolate of SARS-CoV-2 (hCoV-19/Colombia/ANT-UdeA-200325-01/2020).

136

#### 137 **2.5. Cell viability assays**

138 The viability of Vero E6 in the presence of *U. tomentosa* extract was evaluated using a MTT  
139 (4,5-dimethylthiazol-2-yl)-2,5-diphenyl tetrazolium bromide) assay. Briefly, Vero E6 were  
140 seeded at cell density of  $1.0 \times 10^4$  cells/well in 96-well plates and incubated for 24h at 37°C in a  
141 humidified 5% CO<sub>2</sub> atmosphere. After, 100 µL of serial dilutions (1:2) of *U. tomentosa* extract  
142 ranging from 3.1 to 50 µg/mL were added to each well and incubated for 48 h, at 37°C with  
143 5% CO<sub>2</sub>. After incubation, supernatants were removed, cells were washed twice with Phosphate  
144 Buffered Saline (PBS) (Lonza, Rockland, ME, USA) and 30 µL of the MTT reagent (Sigma  
145 Aldrich) (2 mg/mL) were added. The plates were incubated for 2 hours at 37°C, with 5 % CO<sub>2</sub>,  
146 protected from light. Then, formazan crystals were dissolved by adding 100 µL of pure DMSO  
147 to each well. Plates were read in a multiskan GO spectrophotometer (Thermo) at 570 nm. The  
148 average absorbance of cells without treatment was considered as 100% of viability. Based on  
149 this control the cell viability of each treated well was calculated. The treatment concentration  
150 with 50% cytotoxicity (The 50% cytotoxic concentration - CC<sub>50</sub>) was obtained by performing  
151 nonlinear regression followed by the construction of a concentration-response curve (GraphPad  
152 Prism). For MTT assay, 2 independent experiments with four replicates each experiment were  
153 performed (n=8).

154

#### 155 **2.6. Antiviral Assay**

156 The antiviral activity of *U. tomentosa* extract against SARS-CoV-2 was evaluated with a pre-  
157 post strategy where the treatment was added before and after the infection. Briefly, Vero E6  
158 cells were seeded at density of  $1.0 \times 10^4$  cells/well in 96-well plates and incubated for 24 h,

159 at 37°C with 5% CO<sub>2</sub>. After incubation, 50uL of double dilutions of cat's claw (3.1 – 25 µg/mL)  
160 were added to the cell monolayers during 1 h, 37 °C, 5 % CO<sub>2</sub>. Then, the treatment was  
161 removed, and cells were infected with SARS-CoV-2 stock at a multiplicity of infection (MOI)  
162 of 0.01 in 50uL of DMEM supplemented with 2% FBS. The inoculum was removed 1-hour post  
163 infection (h.p.i), replaced by 170 µL of cat's claw dilutions and incubated for 48 h, at 37 °C  
164 with 5 % CO<sub>2</sub>. After, cell culture supernatants were harvested and stored at –80 °C for virus  
165 titration by plaque assay and TCID<sub>50</sub> assay. The supernatant of infected cells without treatment  
166 was used as infection control. Chloroquine (CQ) at 50 µM was used as positive control for  
167 antiviral activity; 2 independent experiments with 3 replicates of each experiment were  
168 performed (n=6).

169

### 170 **2.6.1. Plaque assay for SARS-CoV-2 quantification**

171 The capacity of *U. tomentosa* extract to decrease the PFU/mL of SARS-CoV-2 was evaluated  
172 by plaque assay on Vero E6 cells. Briefly, 1.0 x 10<sup>5</sup> Vero E6 cells per well were seeded in 24-  
173 well plates for 24 h, at 37°C, with 5% CO<sub>2</sub>. Tenfold serial dilutions of the supernatants obtained  
174 from the antiviral assay (200uL per well) were added by duplicate on cell monolayers. After  
175 incubation during 1h, at 37°C, with 5% CO<sub>2</sub>, the viral inoculum was removed and 1 mL of  
176 semi-solid medium (1.5% carboxymethyl-cellulose in DMEM 1X with 2% FBS and 1%  
177 Penicillin-Streptomycin) was added to each well. Cells were incubated for 5 days at 37°C, with  
178 5 % CO<sub>2</sub>. Then, cells were washed twice with PBS. After, cells were fixed and stained with 500  
179 uL of 4 % Formaldehyde / 1 % Crystal violet solution for 30 minutes and washed with PBS.  
180 Plaques obtained from each condition were counted. The reduction in the viral titer after  
181 treatment with each concentration of *U. tomentosa* extract compared to the infection control is  
182 expressed as inhibition percentage. Two independent experiments with two replicates of each  
183 experiment were performed (n=4).

184

### 185 **2.6.2. TCID<sub>50</sub> for SARS-CoV-2 quantification**

186 The capacity of *U. tomentosa* extract to diminish the CPE caused by SARS-CoV-2 on Vero E6  
187 was evaluated by TCID<sub>50</sub> assay. Briefly, 1.2 x 10<sup>4</sup> Vero E6 cells per well were seeded in 96-well  
188 plates for 24 h, at 37°C, with 5% CO<sub>2</sub>. Tenfold serial dilutions of the supernatants obtained  
189 from the antiviral assay (50 µL per well) were added by quadruplicate on cell monolayers. After  
190 1h incubation, at 37°C with 5% CO<sub>2</sub>, the viral inoculum was removed and replaced by 170 µL  
191 of DMEM supplemented with 2% FBS. Cells were incubated for 5 days at 37°C, with 5 % CO<sub>2</sub>.  
192 Then, cells were washed twice with PBS, and then fixed and stained with 100 uL/well of 4 %

193 Formaldehyde / 1 % Crystal violet solution for 30 minutes. Cell monolayers were washed with  
194 PBS. The number of wells positive for CPE were determined for each dilution (CPE is  
195 considered positive when more than 30% of cell monolayer is compromised).

196 The viral titer of TCID<sub>50</sub>/mL was calculated based on Spearman-Kärber method. The reduction  
197 of viral titer after treatment with each concentration of *U. tomentosa* extract compared to  
198 infection control is expressed as inhibition percentage. A control of cells without infection and  
199 treatment was included. Two independent experiments with two replicates of each experiment  
200 were performed (n=4).

201

202

## 203 **2.7. Statistical analysis**

204 The median inhibitory concentration (IC<sub>50</sub>) values represent the concentration of the *U.*  
205 *tomentosa* extract that reduces virus particle production by 50%. The CC<sub>50</sub> values, represent the  
206 cat's claw solution concentration that causes 50 % cytotoxicity. The corresponding dose-  
207 response curves were fitted by non-linear regression analysis using a sigmoidal model. The  
208 calculated selectivity index (SI) represents the ratio of CC<sub>50</sub> to IC<sub>50</sub>. All data was analyzed with  
209 GraphPad Prism (La Jolla, CA, USA) and data are presented as mean ± SEM. Statistical  
210 differences were evaluated via Student's t-test or Mann-Whitney U test, a value of  $p \leq 0.05$   
211 was considered significant, with \* $p \leq 0.05$ , \*\*  $p \leq 0.01$  and \*\*\*  $p \leq 0.001$ .

## 212 **3. Results**

### 213 **3.1. The cell viability assay on Vero E6 cells in the presence of the *U. tomentosa* extract**

214 The viability of Vero E6 cells in presence of *U. tomentosa* was higher than 90.0 % at  
215 concentrations of 25.0 µg/mL or lower, after of 48 h of incubation (**Figure 1**). Cell viability at  
216 50.0 µg/mL was 17.3 %; for this reason, this concentration was not included in the antiviral  
217 assay. The CC<sub>50</sub> calculated for *U. tomentosa* was of 27.1 µg/mL. Chloroquine at 50µM (positive  
218 control of inhibition) did not affect the viability of Vero E6 cells (**Figure 1**).

### 219 **3.2. The *U. tomentosa* extract inhibited the number of infectious viral particles of SARS-CoV-2**

221 An inhibition of 92.7 % of SARS-CoV-2 was obtained after the treatment with *U. tomentosa* at  
222 25.0 µg/mL ( $p < 0.0001$ ) by plaque reduction assay (Figure 2). The *U. tomentosa* extract also

223 showed an inhibition of 31.4 % and 34, 9 % of SARS-CoV-2 at 12.5 and 6.3 µg/mL,  
224 respectively (Figure 2). An increase of 76.0 % of PFU/mL of SARS-CoV-2 was obtained after  
225 the treatment with *U. tomentosa* extract at 3.1 µg/mL (p= 0.02) (**Figure 2**). The EC<sub>50</sub> calculated  
226 to the extract by plaque assay was 6.6 µg/mL (4.89 – 8.85 µg/mL) for a selectivity index of 4.1.  
227 Chloroquine (inhibition positive control) showed an inhibition of 100 % of SARS-CoV-2 at 50  
228 µM (p<0.0001) (Figure 2).

### 229 **3.3. The *U. tomentosa* extract reduced the CPE of SARS-CoV-2**

230 The *U. tomentosa* extract reduced the CPE of the SARS-COV-2 on Vero E6 cells in a 98.6 %  
231 (p=0.02), 92.7 % (p=0.03), 63.2 and 60.4 % at 25, 12.5, 6.3 and 3.1 µg/mL, respectively  
232 (Figure 3). The EC<sub>50</sub> calculated of *U. tomentosa* extract by TCID<sub>50</sub> assay was 2.57 µg/mL (1.05  
233 – 3.75 µg/mL) for a selectivity index of 10.54. Chloroquine (50 µM) inhibited the CPE of  
234 SARS-CoV-2 on Vero E6 in a 100 % (p=0.008) (**Figure 3**).

## 235 **4. Discussion**

236 In South America, the second wave of novel coronaviruses might be more aggressive,  
237 increasing the mortality rate and new cases [24]. Medical trials are underway to determine the  
238 efficacy of several vaccines against SARS-CoV-2 [25]. Otherwise, herbal medicines could  
239 become a promising option to tackle the ongoing pandemic caused by COVID-19 [26]. Some  
240 plant extracts and phytochemicals were modeled over numerous targets of SARS-CoV-2 by  
241 using *in silico* studies, which is the first step in the discovery of new drugs. In China, the use of  
242 herbal formulas has been included in the protocol of primary attention in COVID-19 and  
243 medical trials were carried out, and promising results to ameliorate the symptoms were  
244 demonstrated [27].

245 Our previous study of *U. tomentosa* (cat's claw) on this novel coronavirus using *in-silico*  
246 analysis showed that two possible mechanisms could be involved in the *in vitro* antiviral  
247 activity against SARS-CoV-2 observed in this study. These findings revealed that 3CLpro, an  
248 essential enzyme for viral replication, showed key molecular interactions with speciophylline,  
249 cadambine, and proanthocyanidin B2, with high binding affinities ranging from –8.1 to  
250 –9.2 kcal/mol. [12]. On the other hand, phytochemicals of *U. tomentosa* such as  
251 Proanthocyanidin C1, QAG-2, Uncarine F, 3-isodihydrocadambine, and Uncaric acid (docking  
252 scores: -8.6; -8.2; -7.1; -7.6 and -7.0 kcal/mol, respectively ) showed high binding affinity for  
253 the interface of the RBD–ACE-2. In addition, 3-dihydro-cadambine, Proanthocyanidin B4,



254 Proanthocyanidin B2, and Proanthocyanidin C1 (-7.1; -7.2; -7.2 and -7.0 kcal/mol, respectively)  
255 had the highest binding score on SARS-CoV-2 spike glycoprotein [13]. Since Vero E6 cells are  
256 commonly used to replicate SARS-CoV-2 due to the high expression level of the ACE-2  
257 receptor and lack the ability to produce interferon [28], they are the appropriate substrate to  
258 explore the antiviral activity of phytochemicals targeting the receptor binding.

259 Mechanisms of the antiviral activity of the hydroalcoholic extract of *U. tomentosa*, on other  
260 viruses like Dengue (DEN-2), have been elucidated; alkaloids (pentacyclic alkaloids) from *U.*  
261 *tomentosa* induced apoptosis of infected cells and reduced inflammatory mediators such as  
262 TNF- $\alpha$ , and IFN- $\alpha$  with similar effects to dexamethasone [10]. The quinovic acids (33.1-60  
263  $\mu\text{g/mL}$ ) inhibited the Vesicular Stomatitis Virus [29], and the total extract at concentrations less  
264 than 15.75  $\mu\text{g/mL}$  inhibited the Herpes Simplex Virus (HSV-1) replication when added to Vero  
265 cells at the same time than the virus [11].

266 Here, we demonstrated that *U. tomentosa* also has an antiviral activity *in vitro* against the  
267 SARS-CoV-2 with the EC<sub>50</sub> calculated by plaque assay at 6.6  $\mu\text{g/mL}$  (95% CI: 4.89 – 8.85  
268  $\mu\text{g/mL}$ ) and by TCID<sub>50</sub> assay at 2.57  $\mu\text{g/mL}$  (95% CI: 1.05 – 3.75  $\mu\text{g/mL}$ ). Whilst the CC<sub>50</sub>  
269 corresponding to a 50 % cytotoxic effect was 27.1  $\mu\text{g/mL}$  for *U. tomentosa*. In other medicinal  
270 plants assayed against SARS-CoV-2, similar antiviral activity was shown; in particular,  
271 Echinaforce<sup>®</sup> (an *Echinacea purpurea* preparation) exhibited an antiviral activity at 50  $\mu\text{g/mL}$   
272 [30]. Liu Shen capsule, a traditional Chinese medicine, inhibited the SARS-CoV-2 replication  
273 with an EC<sub>50</sub> value of 0.6024  $\mu\text{g/mL}$  and CC<sub>50</sub> of 4.930  $\mu\text{g/mL}$  [31]. Likewise, Phillyrin (KD-  
274 1), a representative constituent of *Forsythia suspensa* (Thunb.) presented an EC<sub>50</sub> at 63.90  
275  $\mu\text{g/mL}$  and CC<sub>50</sub> of 1959  $\mu\text{g/mL}$  [32]. Sulfated polysaccharides named RPI-27 and heparin  
276 inhibited SARS-CoV-2 *in vitro* with an EC<sub>50</sub> of 8.3  $\pm$  4.6  $\mu\text{g/mL}$  and 36  $\pm$  14  $\mu\text{g/mL}$ ,  
277 respectively [33]. In our study, the selectivity index (SI) of the hydroalcoholic extract of *U.*  
278 *tomentosa* was 4.1. In spite of SI is a low value, theoretically having a higher value would be  
279 more effective and safer during *in vivo* treatment for a given viral infection. However, there is  
280 no evidence of severe toxicity of the *U. tomentosa* and traditionally its use popular in the form  
281 of maceration or decoction is safety [34].

282 There is enough evidence that *U. tomentosa* could ameliorate a wide array of symptoms  
283 associated with COVID-19, like the severe inflammation characterized by a cytokine storm [23]  
284 causing endothelial dysfunction. According to the antiviral activity of *U. tomentosa* against  
285 SARS-CoV-2, several biochemical mechanisms could be involved in each phase of the viral life

286 cycle. As previously reported, *U. tomentosa* could interfere with viral entrance into host cells  
287 [12], affecting viral replication [13]. Furthermore, ACE-2 receptors, which are expressed in  
288 Vero E6 cells could also be blocked by the phytochemicals of *U. tomentosa* during the entrance  
289 of SARS-CoV-2 into the host cells and the aforementioned *in-silico* study would confirm our  
290 hypothesis [13].

291 Besides, it might control the hyperinflammation, via inhibition of IL-1 $\alpha$ , 1 $\beta$ , 17, and TNF- $\alpha$   
292 [35], reducing oxidative stress [36], and protecting the endothelial barrier, via inhibition of IL8,  
293 which is linked to the induction of permeability [37]. It also has antithrombotic potential via  
294 antiplatelet mechanism and by inhibiting of thrombin [15]. Furthermore, *U. tomentosa*  
295 modulates the immune system by extending lymphocyte survival via an anti-apoptotic  
296 mechanism [38]. It is known that the 3 $\alpha$  protein of severe acute respiratory syndrome-associated  
297 coronavirus induces apoptosis in Vero E6 cells [39]; therefore, the phytochemicals found in the  
298 hydroalcoholic extract could inhibit this process and protect of the inflammatory cascade.  
299 Interestingly, *U. tomentosa* bark extract reduced the lung inflammation produced by ozone in  
300 mice [40].

301 Based on our results, *U. tomentosa* is a promising medicinal herb to combat COVID-19, but it is  
302 necessary to continue with animal models followed by clinical trials to validate our results in  
303 the context of COVID-19 patients. This study is the first approach of *U. tomentosa* against  
304 SARS-CoV-2 and we have to explore specific mechanisms of inhibition and propose the main  
305 molecules involved with the antiviral activity. As shown in our phytochemical analysis, the  
306 presence of groups chemicals determined by LC/MS (UHPLC-ESI+-HRMS-Orbitrap) such as  
307 spiroxindole alkaloids, indole glycosides alkaloids, quinovic acid glycosides, and  
308 proanthocyanidins, they could be responsible for the described activity. Here, the mechanisms  
309 discussed about the hydroalcoholic extract of *U. tomentosa* are only inferred under the  
310 mechanisms evaluated in other RNA viruses reported in the literature, and our previous *in-silico*  
311 studies demonstrated on the novel coronavirus.

## 312 **5. Conclusion**

313 *U. tomentosa* has been widely used as anti-inflammatory and immunomodulatory agent.  
314 Previous studies have shown that *U. tomentosa* has a broad spectrum of effects on several RNA  
315 viruses. In this study, we demonstrated that hydroalcoholic extract of *U. tomentosa* stem bark  
316 exerted an anti-SARS-CoV-2 activity by inhibiting virus replication *in-vitro* using the Vero E6

317 cell line, which might support to continue this investigation with specific assays *in-vitro*, then  
318 animal models and finally validate its clinical use with medical trials. However, further specific  
319 *in vitro* assays combined with *in vivo* studies need to be carried out to validate this *in-vitro*  
320 finding. Our investigation shows for the first time the antiviral effect of *U. tomentosa* on novel  
321 coronavirus (SARS-CoV-2).

322

323

## 324 **References**

325 [1] Harcourt J, Tamin A, Lu X, Kamili S, Sakthivel SK, Murray J, et al. Severe acute  
326 respiratory syndrome coronavirus 2 from patient with coronavirus disease, United States.  
327 *Emerg Infect Dis* 2020. <https://doi.org/10.3201/EID2606.200516>.

328 [2] Takeda Y, Murata T, Jamsransuren D, Suganuma K, Kazami Y, Batkhoo J, et al.  
329 *Saxifraga spinulosa*-derived components rapidly inactivate multiple viruses including  
330 SARS-CoV-2. *Viruses* 2020. <https://doi.org/10.3390/v12070699>.

331 [3] World Health Organization. Coronavirus Dis Wkly Epidemiol Updat Wkly Oper Updat  
332 2020. [https://www.who.int/emergencies/diseases/novel-coronavirus-2019/situation-](https://www.who.int/emergencies/diseases/novel-coronavirus-2019/situation-reports)  
333 [reports](https://www.who.int/emergencies/diseases/novel-coronavirus-2019/situation-reports) (accessed October 4, 2020).

334 [4] Poterico JA, Mestanza O. Genetic variants and source of introduction of SARS-CoV-2 in  
335 South America. *J Med Virol* 2020. <https://doi.org/10.1002/jmv.26001>.

336 [5] Lai C-C, Shih T-P, Ko W-C, Tang H-J, Hsueh P-R. Severe acute respiratory syndrome  
337 coronavirus 2 (SARS-CoV-2) and coronavirus disease-2019 (COVID-19): The epidemic  
338 and the challenges. *Int J Antimicrob Agents* 2020;55:105924.  
339 <https://doi.org/10.1016/j.ijantimicag.2020.105924>.

340 [6] WHO. WHO supports scientifically-proven traditional medicineNo Title 2020.  
341 <https://www.afro.who.int/news/who-supports-scientificallly-proven-traditional-medicine>  
342 (accessed October 4, 2020).

343 [7] De Oliveira LZ, Farias ILG, Rigo ML, Glanzner WG, Gonçalves PBD, Cadoná FC, et al.  
344 Effect of *Uncaria tomentosa* extract on apoptosis triggered by oxaliplatin exposure on  
345 HT29 cells. *Evidence-Based Complement Altern Med* 2014.

- 346 <https://doi.org/10.1155/2014/274786>.
- 347 [8] Heitzman ME, Neto CC, Winiarz E, Vaisberg AJ, Hammond GB. Ethnobotany,  
348 phytochemistry and pharmacology of *Uncaria* (Rubiaceae). *Phytochemistry* 2005.  
349 <https://doi.org/10.1016/j.phytochem.2004.10.022>.
- 350 [9] Lock O, Perez E, Villar M, Flores D, Rojas R. Bioactive compounds from plants used in  
351 peruvian traditional medicine. *Nat Prod Commun* 2016.
- 352 [10] Reis SRIN, Valente LMM, Sampaio AL, Siani AC, Gandini M, Azeredo EL, et al.  
353 Immunomodulating and antiviral activities of *Uncaria tomentosa* on human monocytes  
354 infected with Dengue Virus-2. *Int Immunopharmacol* 2008.  
355 <https://doi.org/10.1016/j.intimp.2007.11.010>.
- 356 [11] Caon T, Kaiser S, Feltrin C, de Carvalho A, Sincero TCM, Ortega GG, et al.  
357 Antimutagenic and antiherpetic activities of different preparations from *Uncaria*  
358 *tomentosa* (cat's claw). *Food Chem Toxicol* 2014.  
359 <https://doi.org/10.1016/j.fct.2014.01.013>.
- 360 [12] Yepes-Pérez AF, Herrera-Calderon O, Sánchez-Aparicio J-E, Tiessler-Sala L, Maréchal  
361 J-D, Cardona-G W. Investigating Potential Inhibitory Effect of *Uncaria tomentosa* (Cat's  
362 Claw) against the Main Protease 3CLpro of SARS-CoV-2 by Molecular Modeling.  
363 Evidence-Based Complement Altern Med 2020;2020:1–14.  
364 <https://doi.org/10.1155/2020/4932572>.
- 365 [13] Yepes-Pérez AF, Herrera-Calderon O, Quintero-Saumeth J. *Uncaria tomentosa* (cat's  
366 claw): a promising herbal medicine against SARS-CoV-2/ACE-2 junction and SARS-  
367 CoV-2 spike protein based on molecular modeling. *J Biomol Struct Dyn* 2020:1–17.  
368 <https://doi.org/10.1080/07391102.2020.1837676>.
- 369 [14] Sandoval-Chacón M, Thompson JH, Zhang XJ, Liu X, Mannick EE, Sadowska-  
370 Krowicka H, et al. Antiinflammatory actions of cat's claw: The role of NF-κB. *Aliment*  
371 *Pharmacol Ther* 1998. <https://doi.org/10.1046/j.1365-2036.1998.00424.x>.
- 372 [15] Kolodziejczyk-Czepas J, Ponczek M, Sady-Janczak M, Pilarski R, Bukowska B. Extracts  
373 from *Uncaria tomentosa* as antiplatelet agents and thrombin inhibitors – The in vitro and  
374 in silico study. *J Ethnopharmacol* 2020:113494.  
375 <https://doi.org/10.1016/j.jep.2020.113494>.
- 376 [16] Lenzi RM, Campestrini LH, Okumura LM, Bertol G, Kaiser S, Ortega GG, et al. Effects

- 377 of aqueous fractions of *Uncaria tomentosa* (Willd.) D.C. on macrophage modulatory  
378 activities. *Food Res Int* 2013. <https://doi.org/10.1016/j.foodres.2013.02.042>.
- 379 [17] Navarro-Hoyos M, Lebrón-Aguilar R, Quintanilla-López JE, Cueva C, Hevia D, Quesada  
380 S, et al. Proanthocyanidin characterization and bioactivity of extracts from different parts  
381 of *Uncaria tomentosa* L. (cat's claw). *Antioxidants* 2017.  
382 <https://doi.org/10.3390/antiox6010012>.
- 383 [18] Dietrich F, Kaiser S, Rockenbach L, Figueiró F, Bergamin LS, Cunha FM da, et al.  
384 Quinovic acid glycosides purified fraction from *Uncaria tomentosa* induces cell death by  
385 apoptosis in the T24 human bladder cancer cell line. *Food Chem Toxicol* 2014.  
386 <https://doi.org/10.1016/j.fct.2014.02.037>.
- 387 [19] Aquino R, De Tommasi N, De Simone F, Pizza C. Triterpenes and quinovic acid  
388 glycosides from *Uncaria tomentosa*. *Phytochemistry* 1997.  
389 [https://doi.org/10.1016/S0031-9422\(96\)00716-9](https://doi.org/10.1016/S0031-9422(96)00716-9).
- 390 [20] Peñaloza EMC, Kaiser S, De Resende PE, Pittol V, Carvalho ÂR, Ortega GG. Chemical  
391 composition variability in the *Uncaria tomentosa* (cat's claw) wild population. *Quim*  
392 *Nova* 2015. <https://doi.org/10.5935/0100-4042.20150007>.
- 393 [21] Takayama K. In Vitro and Animal Models for SARS-CoV-2 research. *Trends Pharmacol*  
394 *Sci* 2020. <https://doi.org/10.1016/j.tips.2020.05.005>.
- 395 [22] Bohn MK, Hall A, Sepiashvili L, Jung B, Steele S, Adeli K. Pathophysiology of COVID-  
396 19: Mechanisms underlying disease severity and progression. *Physiology* 2020.  
397 <https://doi.org/10.1152/physiol.00019.2020>.
- 398 [23] Ferreira AO, Polonini HC, Dijkers ECF. Postulated Adjuvant Therapeutic Strategies for  
399 COVID-19. *J Pers Med* 2020;10:80. <https://doi.org/10.3390/jpm10030080>.
- 400 [24] Xu S, Li Y. Beware of the second wave of COVID-19. *Lancet* 2020.  
401 [https://doi.org/10.1016/S0140-6736\(20\)30845-X](https://doi.org/10.1016/S0140-6736(20)30845-X).
- 402 [25] Rabaan AA, Al-Ahmed SH, Sah R, Tiwari R, Yatoo MI, Patel SK, et al. SARS-CoV-  
403 2/COVID-19 and advances in developing potential therapeutics and vaccines to counter  
404 this emerging pandemic. *Ann Clin Microbiol Antimicrob* 2020;19:40.  
405 <https://doi.org/10.1186/s12941-020-00384-w>.
- 406 [26] Ni L, Zhou L, Zhou M, Zhao J, Wang DW. Combination of western medicine and

- 407 Chinese traditional patent medicine in treating a family case of COVID-19. *Front Med*  
408 2020. <https://doi.org/10.1007/s11684-020-0757-x>.
- 409 [27] Xiong X, Wang P, Su K, Cho WC, Xing Y. Chinese herbal medicine for coronavirus  
410 disease 2019: A systematic review and meta-analysis. *Pharmacol Res* 2020.  
411 <https://doi.org/10.1016/j.phrs.2020.105056>.
- 412 [28] Ogando NS, Dalebout TJ, Zevenhoven-Dobbe JC, Limpens RWAL, van der Meer Y,  
413 Caly L, et al. SARS-coronavirus-2 replication in Vero E6 cells: Replication kinetics,  
414 rapid adaptation and cytopathology. *J Gen Virol* 2020.  
415 <https://doi.org/10.1099/jgv.0.001453>.
- 416 [29] Aquino R, De Simone F, Pizza C, Conti C, Stein ML. Plant metabolites. Structure and in  
417 vitro antiviral activity of quinovic acid glycosides from *uncaria tomentosa* and *guettarda*  
418 *platypoda*. *J Nat Prod* 1989. <https://doi.org/10.1021/np50064a002>.
- 419 [30] Signer J, Jonsdottir HR, Albrich WC, Strasser M, Züst R, Ryter S, et al. In vitro virucidal  
420 activity of Echinaforce®, an *Echinacea purpurea* preparation, against coronaviruses,  
421 including common cold coronavirus 229E and SARS-CoV-2. *Virol J* 2020.  
422 <https://doi.org/10.1186/s12985-020-01401-2>.
- 423 [31] Ma Q, Pan W, Li R, Liu B, Li C, Xie Y, et al. Liu Shen capsule shows antiviral and anti-  
424 inflammatory abilities against novel coronavirus SARS-CoV-2 via suppression of NF- $\kappa$ B  
425 signaling pathway. *Pharmacol Res* 2020. <https://doi.org/10.1016/j.phrs.2020.104850>.
- 426 [32] Ma Q, Li R, Pan W, Huang W, Liu B, Xie Y, et al. Phillyrin (KD-1) exerts anti-viral and  
427 anti-inflammatory activities against novel coronavirus (SARS-CoV-2) and human  
428 coronavirus 229E (HCoV-229E) by suppressing the nuclear factor kappa B (NF- $\kappa$ B)  
429 signaling pathway. *Phytomedicine* 2020. <https://doi.org/10.1016/j.phymed.2020.153296>.
- 430 [33] Kwon PS, Oh H, Kwon S-J, Jin W, Zhang F, Fraser K, et al. Sulfated polysaccharides  
431 effectively inhibit SARS-CoV-2 in vitro. *Cell Discov* 2020;6:50.  
432 <https://doi.org/10.1038/s41421-020-00192-8>.
- 433 [34] Maruoka T, Kitanaka A, Kubota Y, Yamaoka G, Kameda T, Imataki O, et al.  
434 Lemongrass essential oil and citral inhibit Src/Stat3 activity and suppress the  
435 proliferation/survival of small-cell lung cancer cells, alone or in combination with  
436 chemotherapeutic agents. *Int J Oncol* 2018. <https://doi.org/10.3892/ijo.2018.4314>.
- 437 [35] Rojas-Duran R, González-Aspajo G, Ruiz-Martel C, Bourdy G, Doroteo-Ortega VH,

- 438 Alban-Castillo J, et al. Anti-inflammatory activity of Mitraphylline isolated from *Uncaria*  
439 *tomentosa* bark. *J Ethnopharmacol* 2012. <https://doi.org/10.1016/j.jep.2012.07.015>.
- 440 [36] Cheng AC, Jian CB, Huang YT, Lai CS, Hsu PC, Pan MH. Induction of apoptosis by  
441 *Uncaria tomentosa* through reactive oxygen species production, cytochrome c release,  
442 and caspases activation in human leukemia cells. *Food Chem Toxicol* 2007.  
443 <https://doi.org/10.1016/j.fct.2007.05.016>.
- 444 [37] Lima-Junior RS, Da Silva Mello C, Kubelka CF, Siani AC, Valente LMM. *Uncaria*  
445 *tomentosa* alkaloidal fraction reduces paracellular permeability, il-8 and ns1 production  
446 on human microvascular endothelial cells infected with dengue virus. *Nat Prod Commun*  
447 2013. <https://doi.org/10.1177/1934578X1300801112>.
- 448 [38] Sandoval M, Charbonnet RM, Okuhama NN, Roberts J, Krenova Z, Trentacosti AM, et  
449 al. Cat's claw inhibits TNF $\alpha$  production and scavenges free radicals: Role in  
450 cytoprotection. *Free Radic Biol Med* 2000. [https://doi.org/10.1016/S0891-](https://doi.org/10.1016/S0891-5849(00)00327-0)  
451 [5849\(00\)00327-0](https://doi.org/10.1016/S0891-5849(00)00327-0).
- 452 [39] Law PTW, Wong CH, Au TCC, Chuck CP, Kong SK, Chan PKS, et al. The 3a protein of  
453 severe acute respiratory syndrome-associated coronavirus induces apoptosis in Vero E6  
454 cells. *J Gen Virol* 2005. <https://doi.org/10.1099/vir.0.80813-0>.
- 455 [40] Cisneros FJ, Jayo M, Niedziela L. An *Uncaria tomentosa* (cat's claw) extract protects  
456 mice against ozone-induced lung inflammation. *J Ethnopharmacol* 2005.  
457 <https://doi.org/10.1016/j.jep.2004.06.039>.

458

459

460

461

462

463

464

465

466

467

468

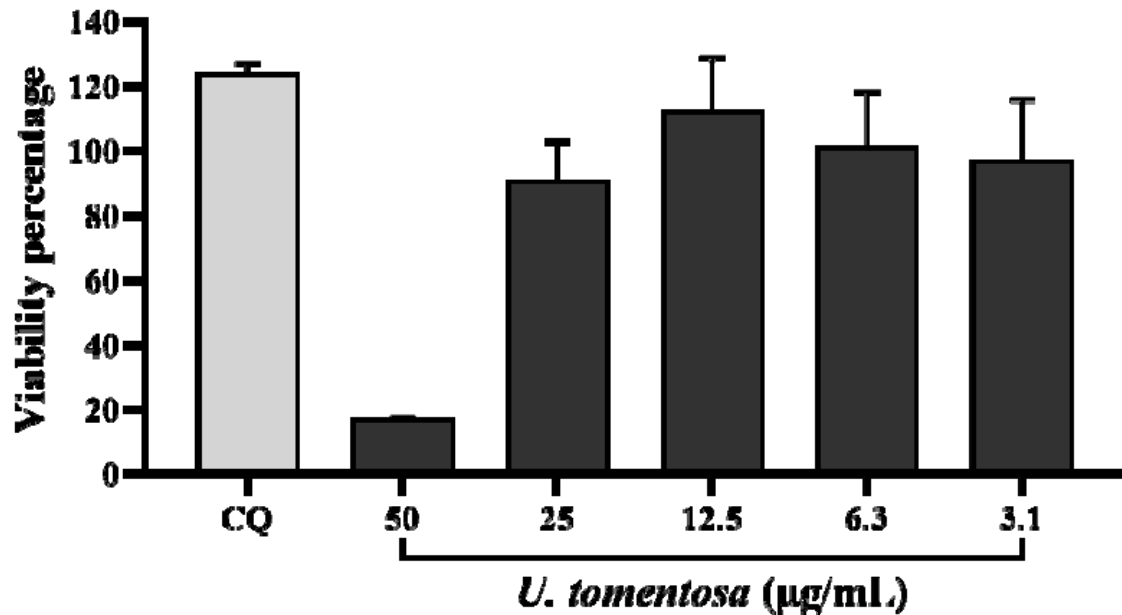

469

470 **Figure 1. Vero E6 cells viability in presence of the *U. tomentosa* extract.** The figure  
471 represents the viability percentage of Vero E6 cells after 48h of treatment with *U. tomentosa*  
472 (3.1 to 50.0 µg/mL). The viability percentages of treated cell were calculated based on the  
473 average absorbance control of cells without treatment. Chloroquine (CQ) was used as inhibition  
474 control of the antiviral strategy. Bars represent mean values ± SEM (2 independent experiments  
475 with four replicates each experiment were performed, n=8).

476



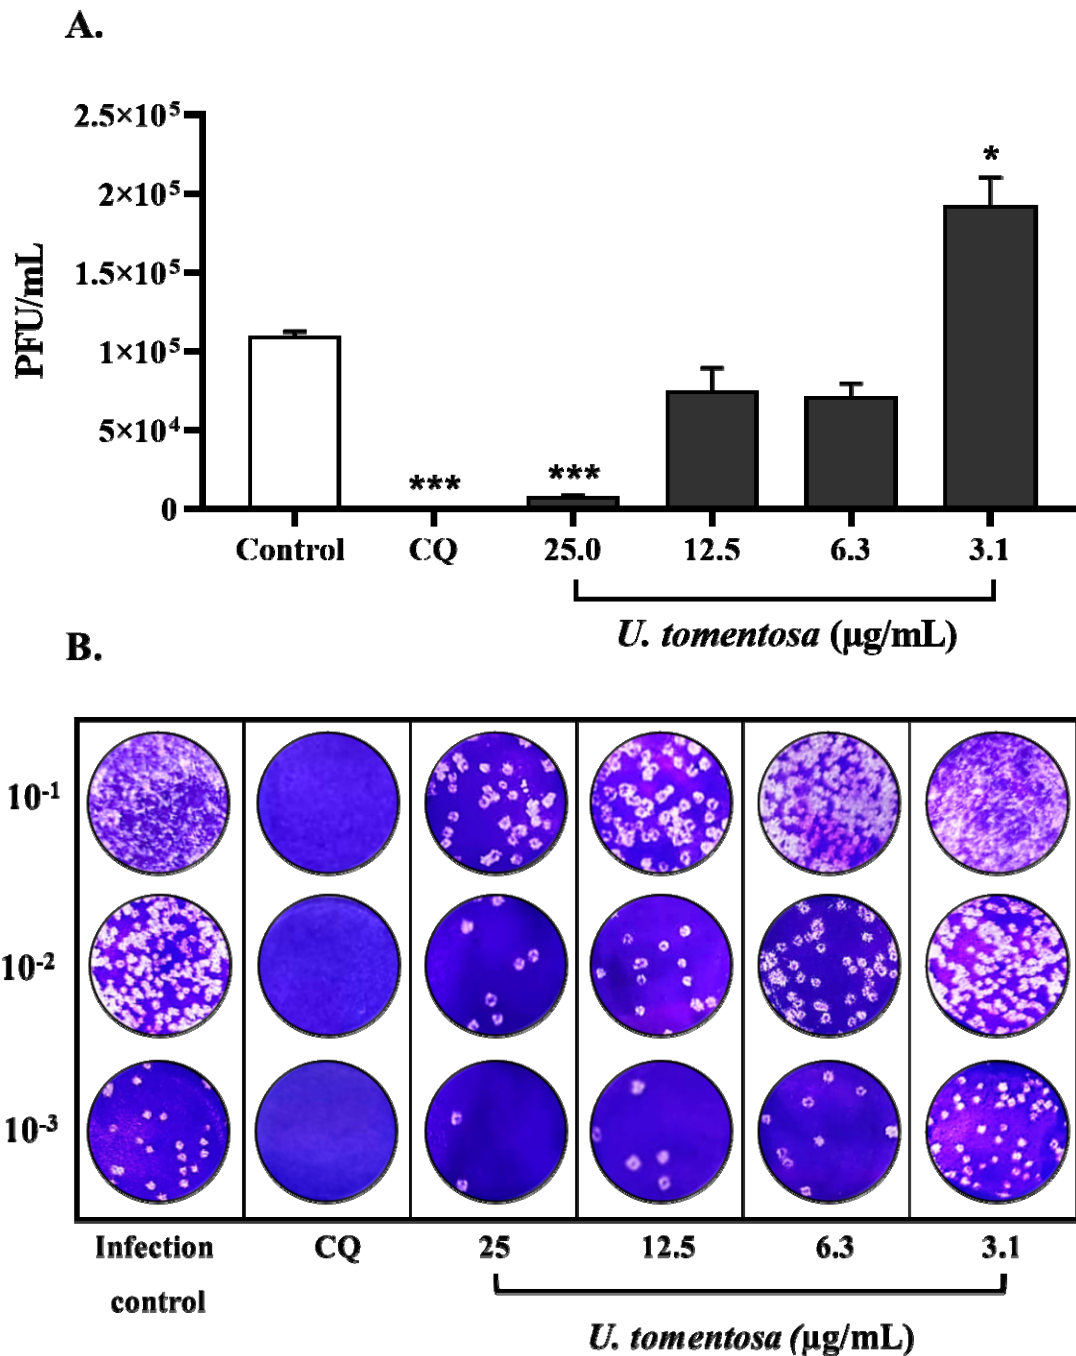

477

478 **Figure 2. Antiviral activity *in vitro* of *U. tomentosa* extract against SARS-CoV-2 by plaque**  
479 **assay. A.** The figure represents the viral titer (PFU/mL) of supernatants harvested after the  
480 treatment with the *U. tomentosa* extract quantified by plaque assay (n=4). Chloroquine (CQ)  
481 was used as an inhibition positive control of the antiviral strategy. \*  $p \leq 0.05$ , \*\*  $p \leq 0.01$   
482 and \*\*\*  $p \leq 0.001$  **B.** Representative plaques of the antiviral evaluation of the *U. tomentosa*  
483 extract against SARS- CoV-2 on Vero E6 cells.

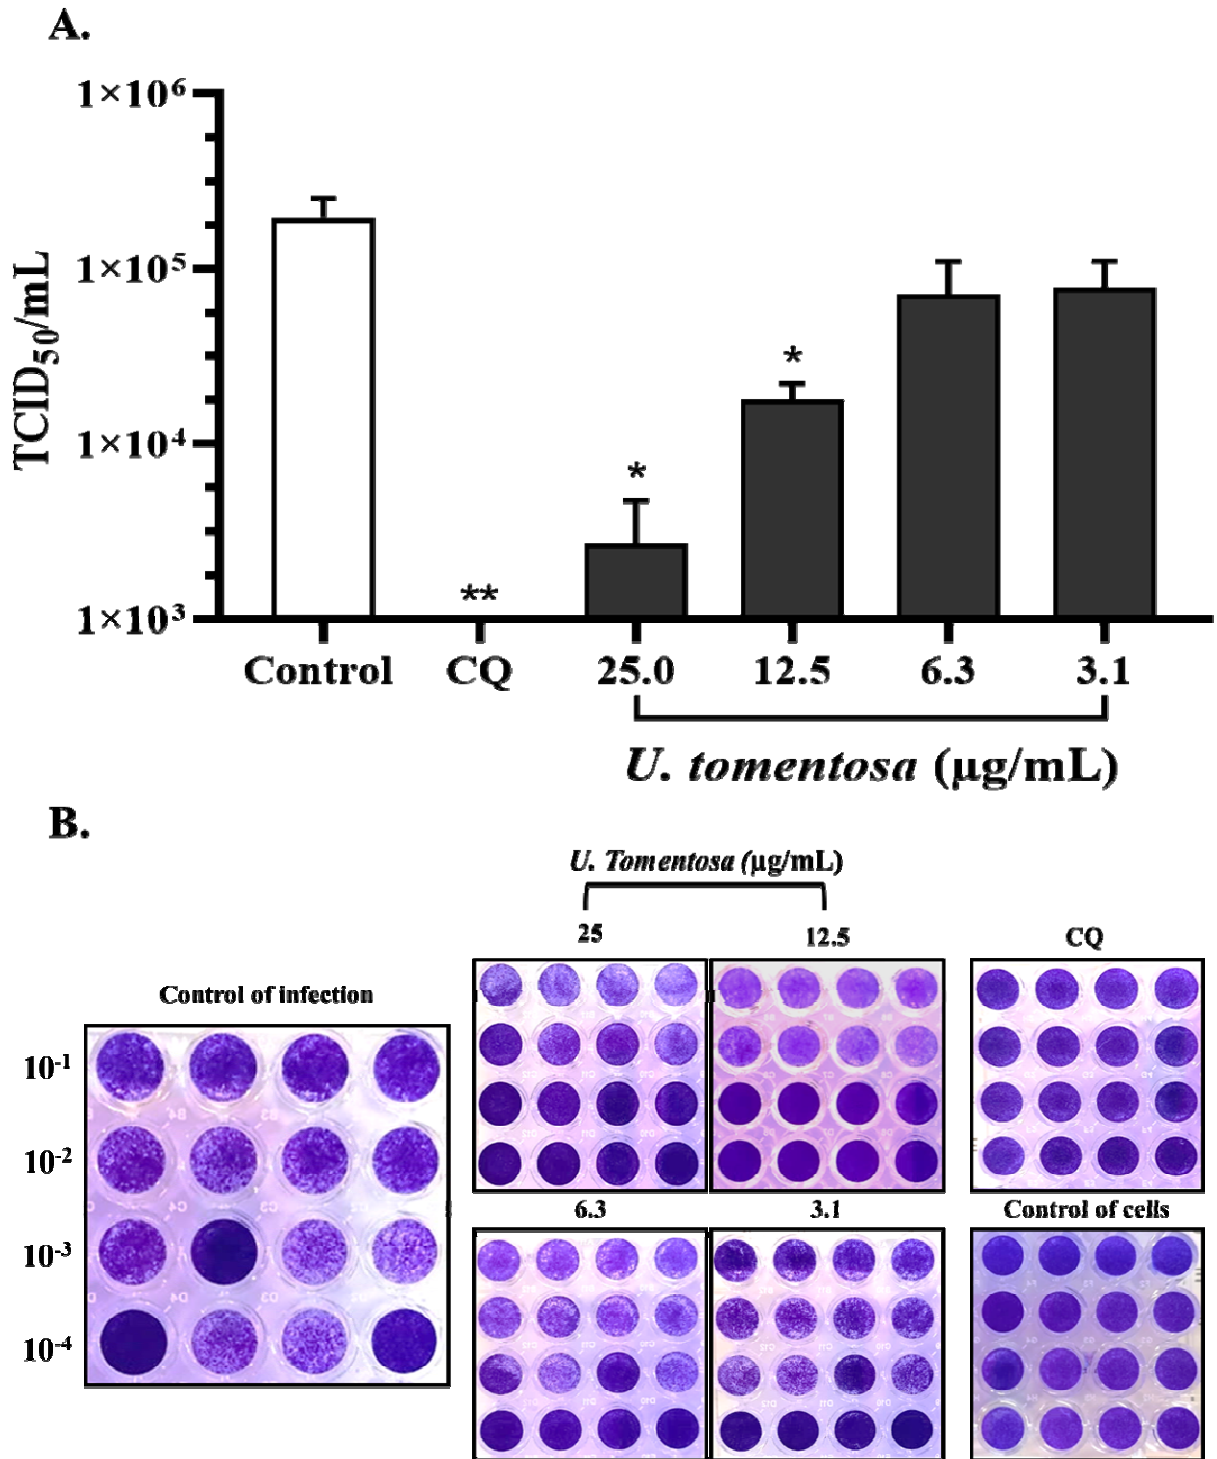

484

485 **Figure 3. Antiviral activity *in vitro* of *U. tomentosa* extract against SARS-CoV-2 by TCID<sub>50</sub>**  
486 **assay.** The figure represents the viral titer (TCID<sub>50</sub>/mL) quantified by TCID<sub>50</sub> assay on  
487 supernatants harvested from the treatment with the *U. tomentosa* extract (n=4). Chloroquine  
488 (CQ) was used as an inhibition positive control of the antiviral strategy. \* p ≤ 0.05 and \*\*

489  $p \leq 0.01$  **B.** Representative images of the antiviral evaluation of the *U. tomentosa* extract  
490 against SARS-CoV-2 on Vero E6 cells by TCID<sub>50</sub> assay revealed by crystal violet.

491
